# Supplementary material for: Alternating cationic copolymerizations of vinyl ethers and sequence-programmed cyclic trimer consisting of one vinyl ether and two aldehydes for ABCC-type periodic terpolymers
Source: Royal Society of Chemistry journal article supplement (doi:10.1039/d3py00278k), 2023-01-01
Supplement: d3py00278k1.pdf [file d3py00278k1.pdf]

*Electronic supplementary information for:*

**Alternating cationic copolymerizations of vinyl ethers and sequence-programmed cyclic trimer consisting of one vinyl ether and two aldehydes for ABCC-type periodic terpolymers**

*Tadashi Naito, Arihiro Kanazawa\*, and Sadahito Aoshima\**

Department of Macromolecular Science, Graduate School of Science, Osaka University, Toyonaka, Osaka 560-0043, Japan

**Contents:**

**Experimental Section** (Materials and Characterization subsections)

**Figure S1.**  $^1\text{H}$  NMR spectrum of the product obtained in the cyclotrimerization of IBVE and BzA

**Figure S2.**  $^{13}\text{C}$  NMR and DEPT 135 NMR spectra of product obtained in the cyclotrimerization of IBVE and BzA

**Figure S3.** ESI-MS spectrum of the product obtained in the cyclotrimerization of IBVE and BzA

**Figure S4.**  $^1\text{H}$  NMR spectrum of the product obtained by the cyclotrimerization of IBVE and NNE

**Figure S5.**  $^1\text{H}$  NMR spectrum of the cyclic trimer consisting of IBVE and NNE

**Figure S6.**  $^{13}\text{C}$  NMR spectrum of the cyclic trimer consisting of IBVE and NNE

**Figure S7.** ESI-MS spectrum of the cyclic trimer consisting of IBVE and NNE

**Figure S8.**  $^1\text{H}$  NMR spectrum of the cyclic trimer consisting of CEVE and NNE

**Figure S9.**  $^{13}\text{C}$  NMR spectrum of the cyclic trimer consisting of CEVE and NNE

**Figure S10.** ESI-MS spectrum of the cyclic trimer consisting of CEVE and NNE

**Figure S11.**  $^1\text{H}$  NMR spectrum of the cyclic trimer consisting of IPVE and NNE

**Figure S12.**  $^{13}\text{C}$  NMR spectrum of the cyclic trimer consisting of IPVE and NNE

**Figure S13.** ESI-MS spectrum of the cyclic trimer consisting of IPVE and NNE

**Figure S14.**  $^1\text{H}$  NMR spectrum of the cyclic trimer consisting of pMeSt and BzA

**Figure S15.**  $^1\text{H}$  NMR spectrum of the cyclic trimer consisting of DPE and BzA

**Figure S16.**  $^1\text{H}$  NMR spectra of the polymer obtained by the copolymerization of CEVE and the cyclic trimer consisting of IBVE and BzA and its acid hydrolysis product

**Figure S17.** MWD curve of the product obtained in the cationic homopolymerization of the cyclic trimer consisting of IBVE and NNE

**Figure S18.**  $^{13}\text{C}$  NMR and DEPT 135 NMR spectra of the methanolysis product of the polymer obtained by the copolymerization of CEVE and the cyclic trimer consisting of IBVE and NNE

**Figure S19.**  $^1\text{H}$ - $^1\text{H}$  COSY NMR spectrum of the methanolysis product of polymer obtained by the copolymerization of CEVE and the cyclic trimer consisting of IBVE and NNE

**Figure S20.**  $^1\text{H}$  NMR spectra of the polymer obtained by the copolymerization of CEVE and the cyclic trimer consisting of IPVE and NNE and its acid hydrolysis product

**Table S1.** Cationic copolymerization of CEVE and the cyclic trimer consisting of IBVE and NNE at various temperatures

**Figure S21.** MALDI-TOF-MS spectrum of the polymer obtained by the alternating cationic copolymerization of CEVE and the cyclic trimer consisting of IBVE and NNE

## Materials

CEVE (TCI; >97.0%), pMeSt (Sigma-Aldrich; 96.0%), IBVE (TCI; >99.0%), and IPVE (Wako; >97.0%) were washed with 10% sodium hydroxide solution and then water and distilled twice over calcium hydride under reduced (CEVE and pMeSt) or atmospheric (IBVE and IPVE) pressure. BzA (Wako; >98.0%), NNE (TCI; > 95.0%), and DPE (TCI; >98.0%) were distilled over calcium hydride twice under reduced pressure before use. EA was distilled twice over calcium hydride. 1,4-DO (Nacalai Tesque; >99.5%) and THF (Wako; >99.5%) were distilled over calcium hydride and then lithium aluminum hydride. The adduct of IBVE with acetic acid (IBEA) was prepared from the addition reaction of IBVE and acetic acid. TiCl<sub>4</sub> (Sigma-Aldrich; 1.0 M solution in toluene), SnCl<sub>4</sub> (Sigma-Aldrich; 1.0 M solution in heptane), EtAlCl<sub>2</sub> (Wako, 1.0 M solution in hexane), and Bi(OTf)<sub>3</sub> (Sigma-Aldrich) were used as received. GaCl<sub>3</sub> (Strem; ≥99.99%) was used without further purification after preparing stock solutions in *n*-hexane. Toluene (Wako; super-dehydrated), dichloromethane (Wako; super-dehydrated), and *n*-hexane (Wako; >96.0%) were dried by passage through solvent purification columns (Glass Contour). Hydrochloric acid (Nacalai Tesque) and sodium hydroxide (Nacalai Tesque) for acid methanolysis were used as received.

## Characterization

The MWD of the polymers was measured by GPC in chloroform at 40 °C with polystyrene gel columns [TSKgel GMH<sub>HR</sub>-M × 2 (exclusive limit molecular weight =  $4 \times 10^6$ ; bead size = 5 μm; column size = 7.8 mm I.D. × 300 mm); flow rate = 1.0 mL min<sup>-1</sup>] connected to a JASCO PU-4580 pump, a Tosoh CO-8020 column oven, a UV-8020 ultraviolet detector, and an RI-8020 refractive index detector. The number-average molecular weight ( $M_n$ ) and the polydispersity ratio (weight-average molecular weight/number-average molecular weight [ $M_w/M_n$ ]) were calculated from the chromatograms with respect to 16 polystyrene standards (Tosoh;  $M_n = 5.0 \times 10^2$ — $1.09 \times 10^6$ ,  $M_w/M_n \leq 1.1$ ). NMR spectra were recorded using a JEOL JNM-ECA 500 (500.16 MHz for <sup>1</sup>H and 125.77 MHz for <sup>13</sup>C) spectrometer. ESI-MS spectra were recorded using an LTQ orbitrap XL spectrometer (Thermo Scientific).

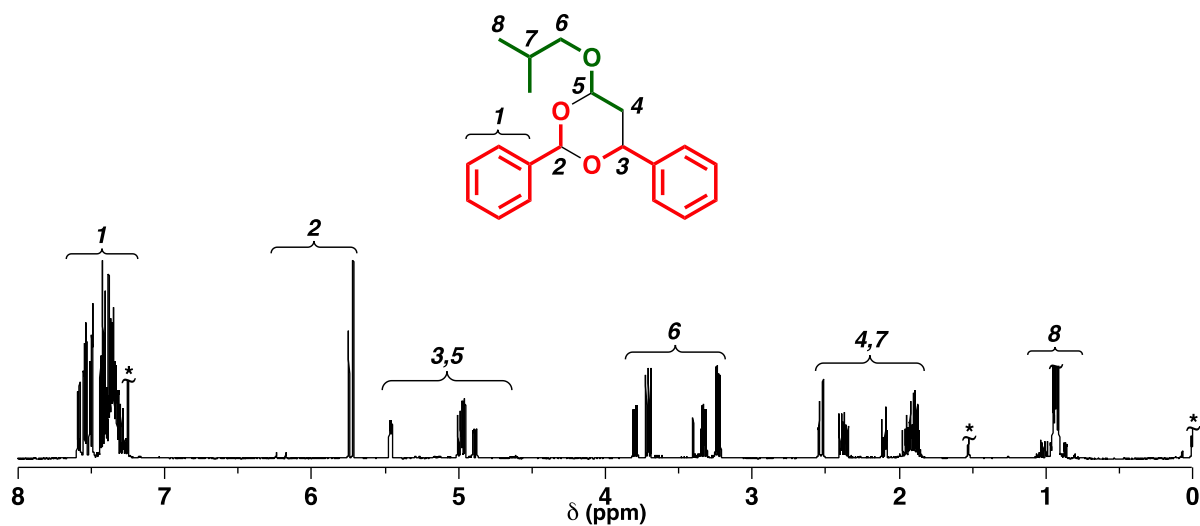

**Figure S1.**  $^1\text{H}$  NMR spectrum of the product obtained in the cyclotrimerization of IBVE and BzA (entry 1 in Table 1; in  $\text{CDCl}_3$  at  $30^\circ\text{C}$ ; \*  $\text{CHCl}_3$ , water, or TMS).

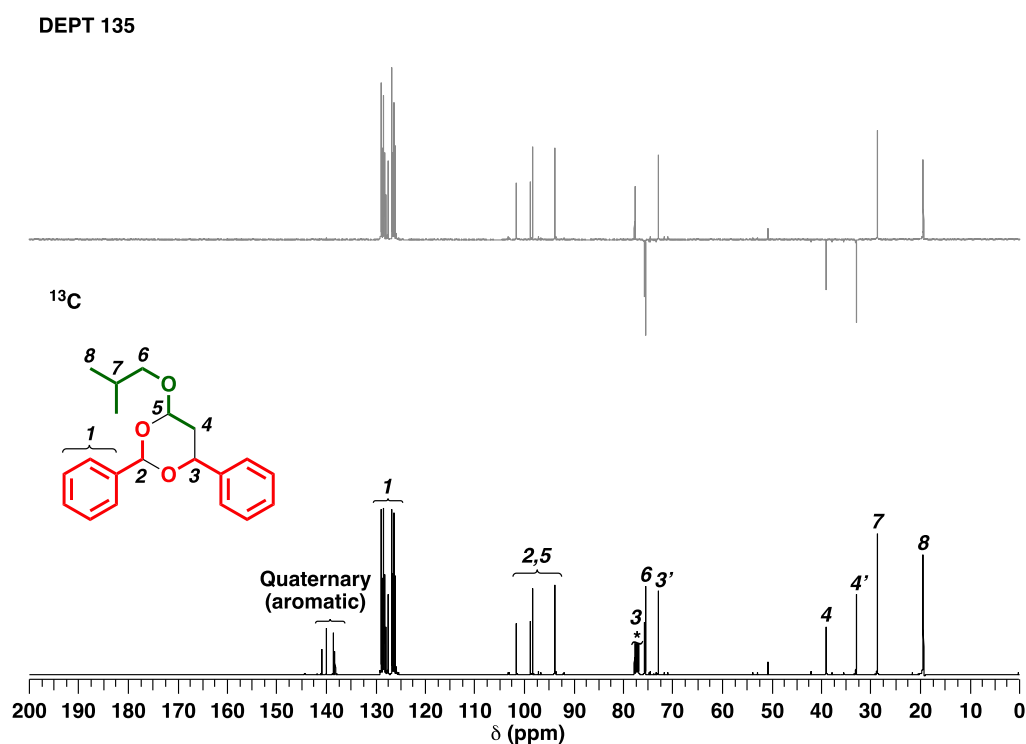

**Figure S2.**  $^{13}\text{C}$  and DEPT 135 NMR spectra of the product obtained in the cyclotrimerization of IBVE and BzA [entry 1 in Table 1; the same sample as that for  $^1\text{H}$  NMR analysis (Figure S1); in  $\text{CDCl}_3$  at  $30^\circ\text{C}$ ; \*  $\text{CDCl}_3$ ].

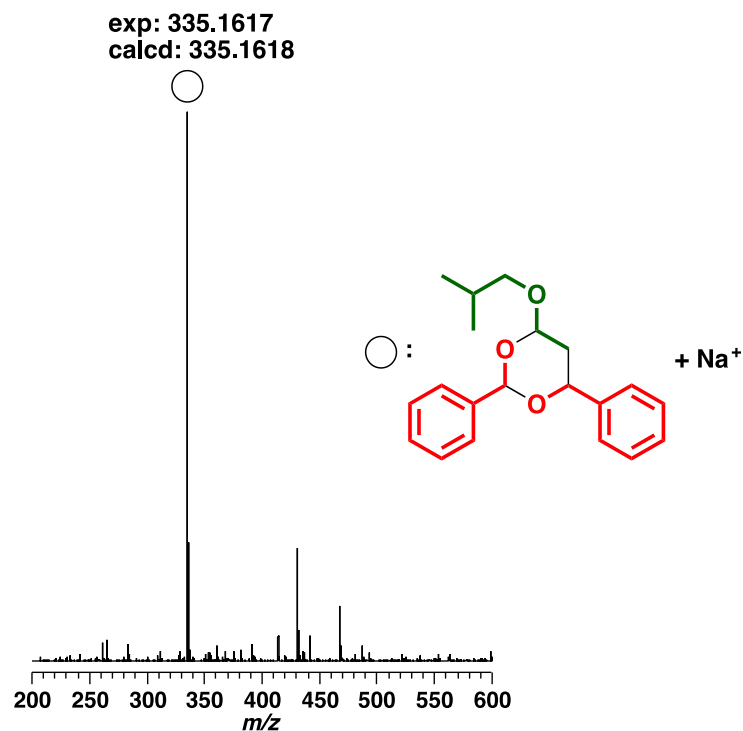

**Figure S3.** ESI-MS spectrum of the product obtained in the cyclotrimerization of IBVE and BzA [entry 1 in Table 1; the same sample as that for <sup>1</sup>H NMR analysis (Figures S1)].

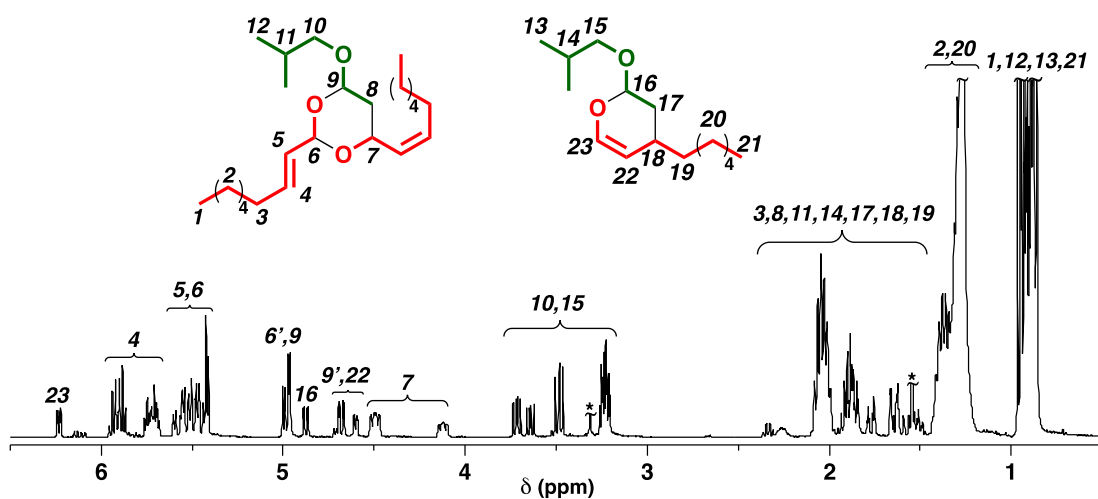

**Figure S4.** <sup>1</sup>H NMR spectrum of the product obtained by the cyclotrimerization of IBVE and NNE (entry 2 in Table 1; in CDCl<sub>3</sub> at 30 °C; \* water or methanol).

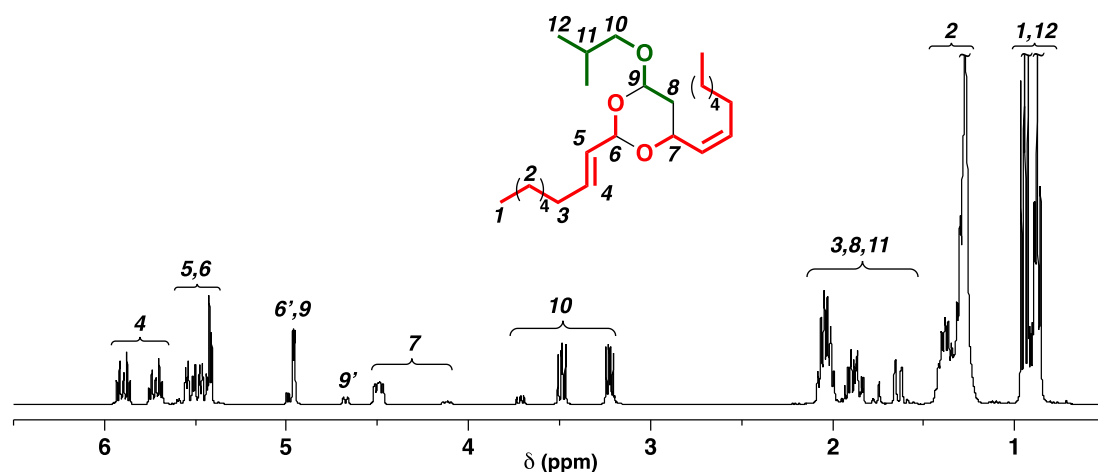

**Figure S5.**  $^1\text{H}$  NMR spectrum of the cyclic trimer consisting of IBVE and NNE separated by silica gel column chromatography ( $[\text{IBVE}]_0 = 0.50 \text{ M}$ ,  $[\text{NNE}]_0 = 0.99 \text{ M}$ ,  $[\text{IBVE}]_{\text{add}} = 0.50 \text{ M}$ ,  $[\text{EtAlCl}_2]_0 = 50 \text{ mM}$ ,  $[\text{THF}] = 1.0 \text{ M}$ , in dichloromethane at  $0 \text{ }^\circ\text{C}$ ; in  $\text{CDCl}_3$  at  $30 \text{ }^\circ\text{C}$ ).

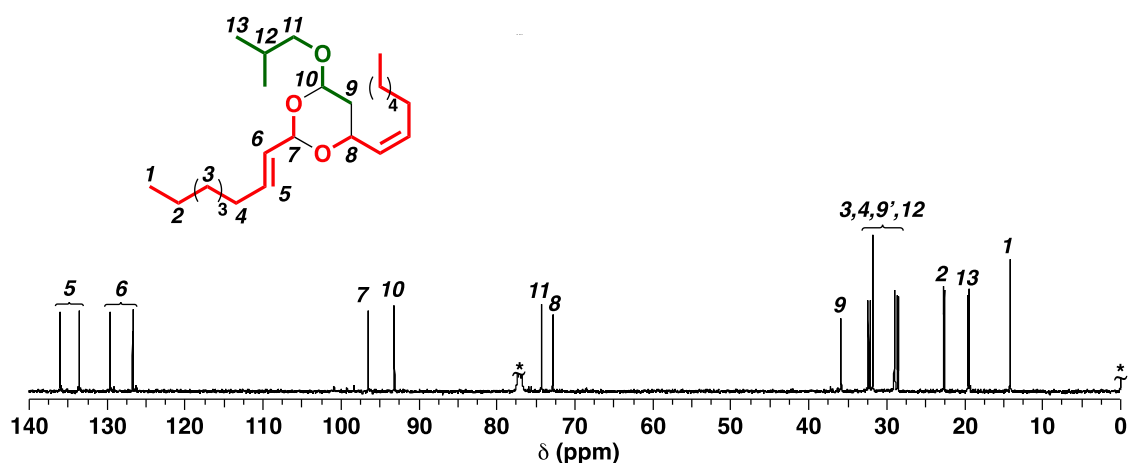

**Figure S6.**  $^{13}\text{C}$  NMR spectrum of the cyclic trimer consisting of IBVE and NNE separated by silica gel column chromatography [the same sample as that for  $^1\text{H}$  NMR analysis (Figure S5); in  $\text{CDCl}_3$  at  $30 \text{ }^\circ\text{C}$ ; \*  $\text{CDCl}_3$  or TMS].

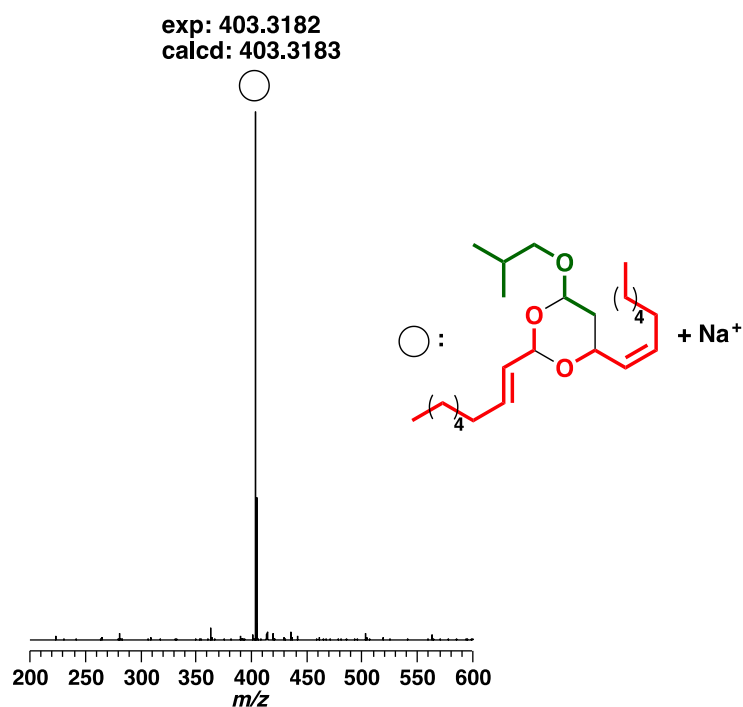

**Figure S7.** ESI-MS spectrum of the cyclic trimer consisting of IBVE and NNE [a different sample as that for <sup>1</sup>H NMR analysis (Figure S5)].

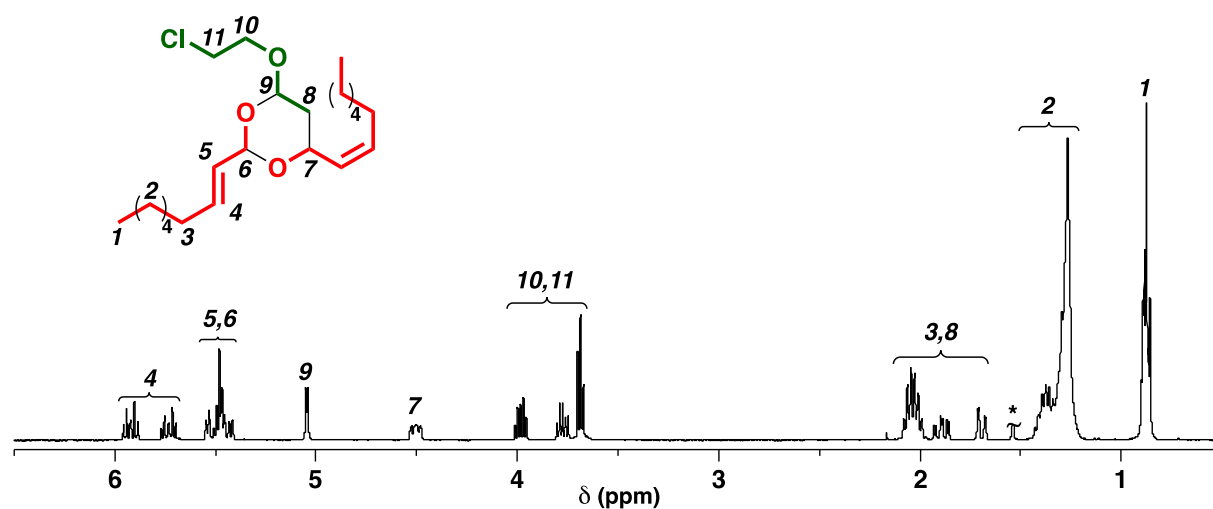

**Figure S8.** <sup>1</sup>H NMR spectrum of the cyclic trimer consisting of CEVE and NNE separated by silica gel column chromatography ([CEVE]<sub>0</sub> = 0.49 M, [NNE]<sub>0</sub> = 1.0 M, [CEVE]<sub>add</sub> = 0.49 M, [EtAlCl<sub>2</sub>]<sub>0</sub> = 50 mM, [THF] = 1.0 M, in dichloromethane at 0 °C; in CDCl<sub>3</sub> at 30 °C; \* water).

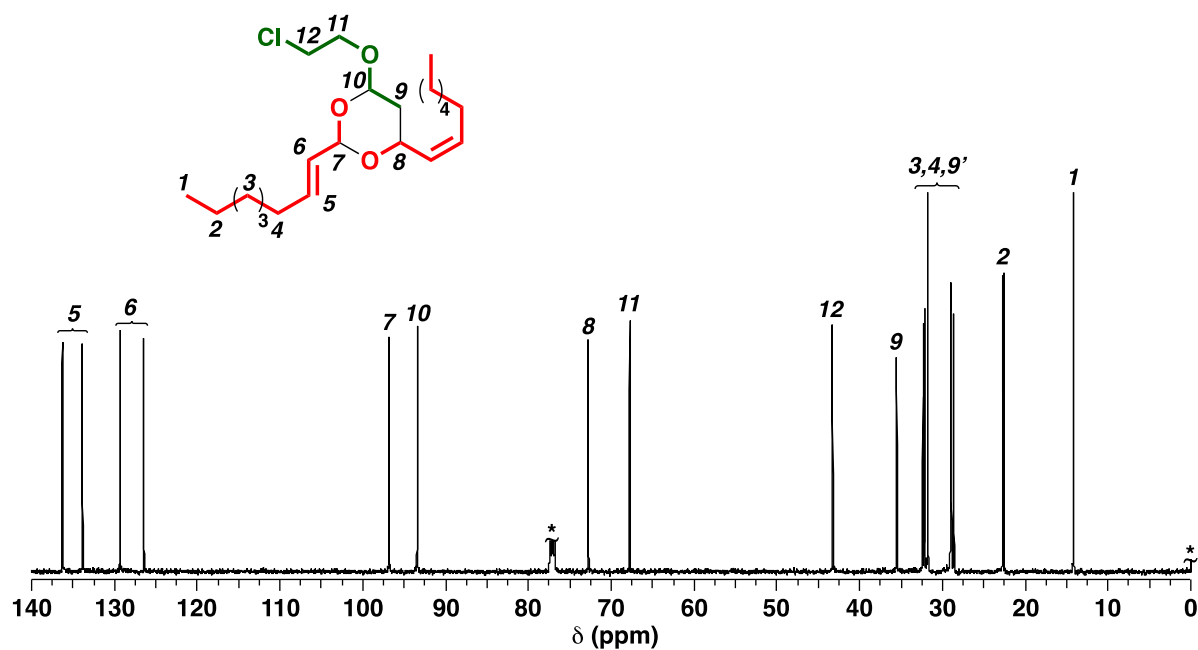

**Figure S9.**  $^{13}\text{C}$  NMR spectrum of the cyclic trimer consisting of CEVE and NNE separated by silica gel column chromatography [the same sample as that for  $^1\text{H}$  NMR analysis (Figure S8); in  $\text{CDCl}_3$  at  $30^\circ\text{C}$ ; \*  $\text{CDCl}_3$  or TMS].

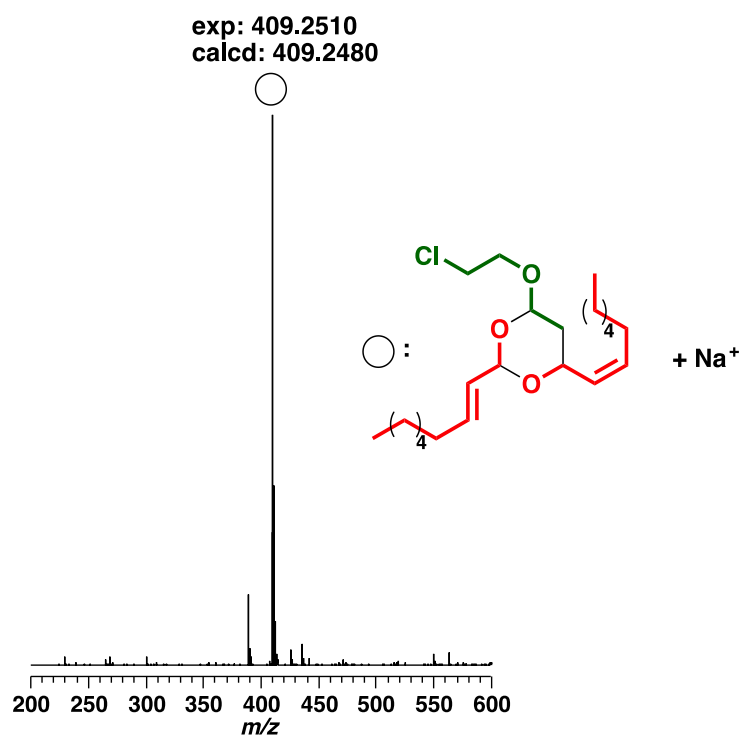

**Figure S10.** ESI-MS spectrum of the cyclic trimer consisting of CEVE and NNE [a different sample as that for  $^1\text{H}$  NMR analysis (Figure S8)].

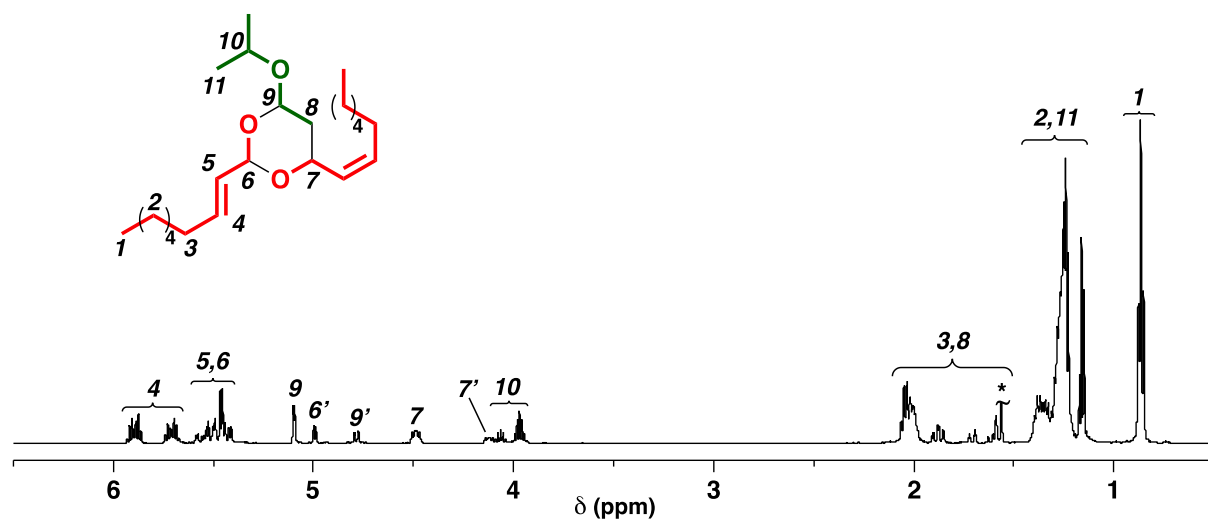

**Figure S11.**  $^1\text{H}$  NMR spectrum of the cyclic trimer consisting of IPVE and NNE separated by silica gel column chromatography ( $[\text{IPVE}]_0 = 0.52 \text{ M}$ ,  $[\text{NNE}]_0 = 0.85 \text{ M}$ ,  $[\text{IPVE}]_{\text{add}} = 0.52 \text{ M}$ ,  $[\text{EtAlCl}_2]_0 = 50 \text{ mM}$ ,  $[\text{THF}] = 1.0 \text{ M}$ , in dichloromethane at  $0 \text{ }^\circ\text{C}$ ; in  $\text{CDCl}_3$  at  $30 \text{ }^\circ\text{C}$ ; \* water).

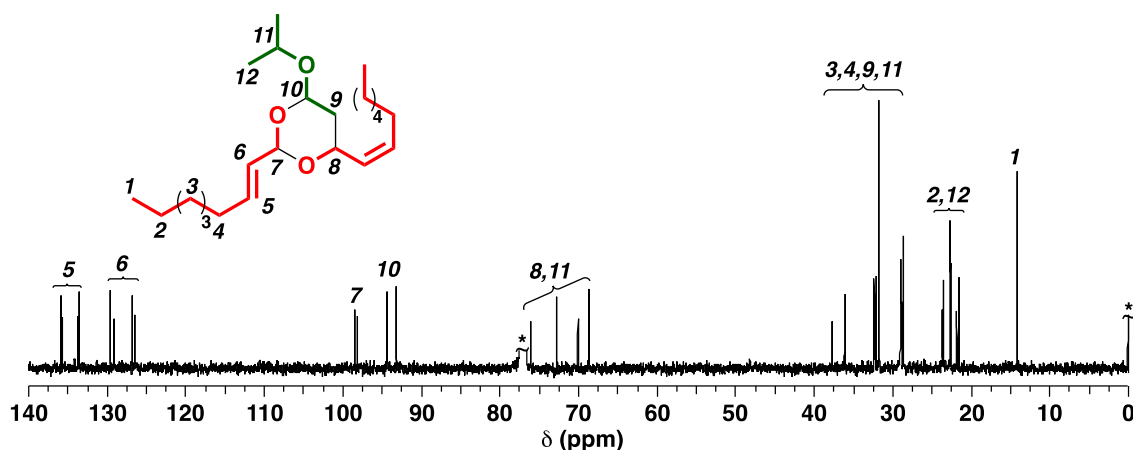

**Figure S12.**  $^{13}\text{C}$  NMR spectrum of the cyclic trimer consisting of IPVE and NNE separated by silica gel column chromatography [the same sample as that for  $^1\text{H}$  NMR analysis (Figure S11); in  $\text{CDCl}_3$  at  $30 \text{ }^\circ\text{C}$ ; \*  $\text{CDCl}_3$  or TMS].



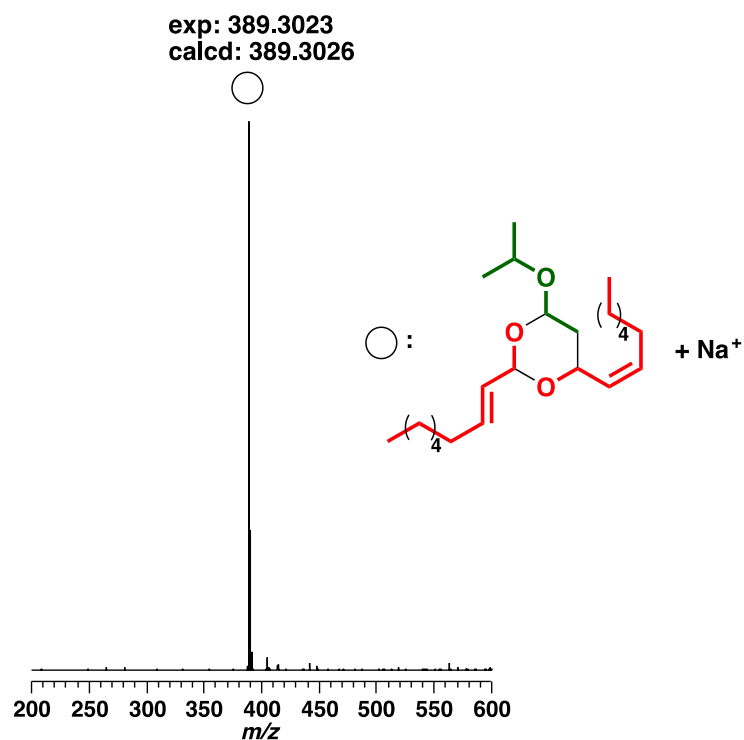

**Figure S13.** ESI-MS spectrum of the cyclic trimer consisting of IPVE and NNE [a different sample as that for  $^1\text{H}$  NMR analysis (Figure S11)].

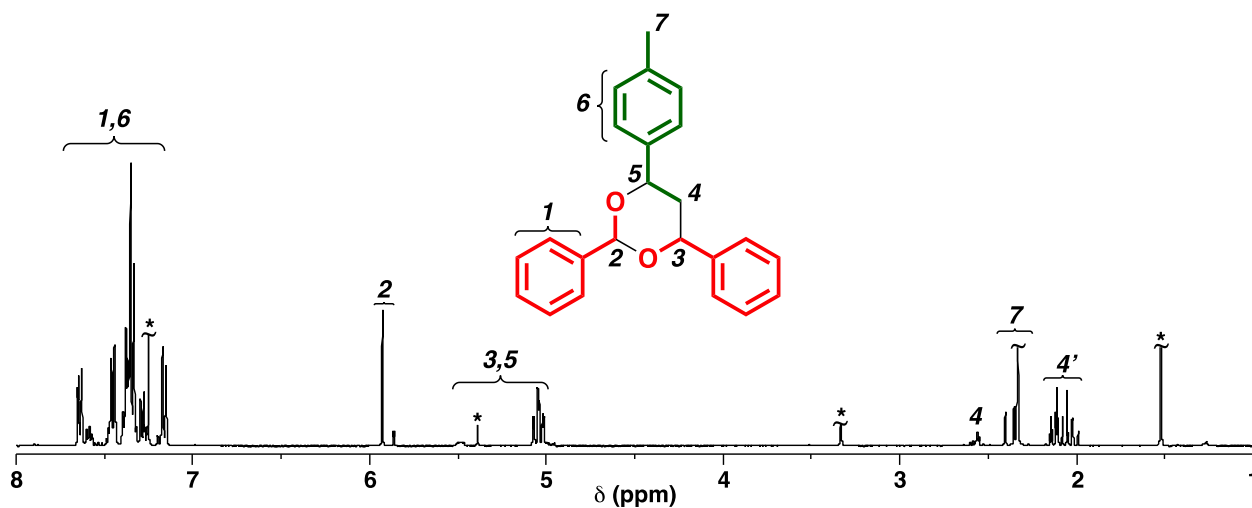

**Figure S14.**  $^1\text{H}$  NMR spectrum of the cyclic trimer consisting of pMeSt and BzA separated by silica gel column chromatography (entry 5 in Table 1; in  $\text{CDCl}_3$  at 30  $^\circ\text{C}$ ; \*  $\text{CDCl}_3$ , water, or others).

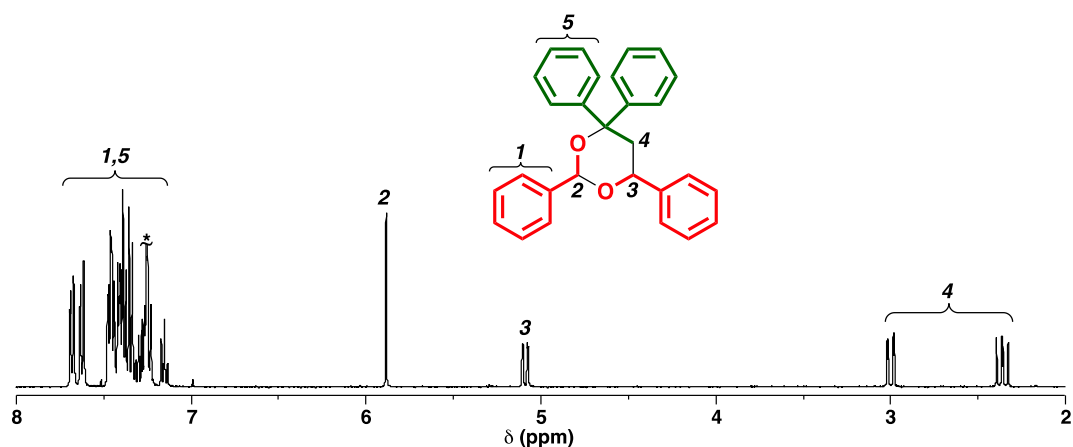

**Figure S15.**  $^1\text{H}$  NMR spectrum of the cyclic trimer consisting of DPE and BzA after purified by reprecipitation in methanol (entry 6 in Table 1; in  $\text{CDCl}_3$  at  $30\text{ }^\circ\text{C}$ ; \*  $\text{CHCl}_3$ ).

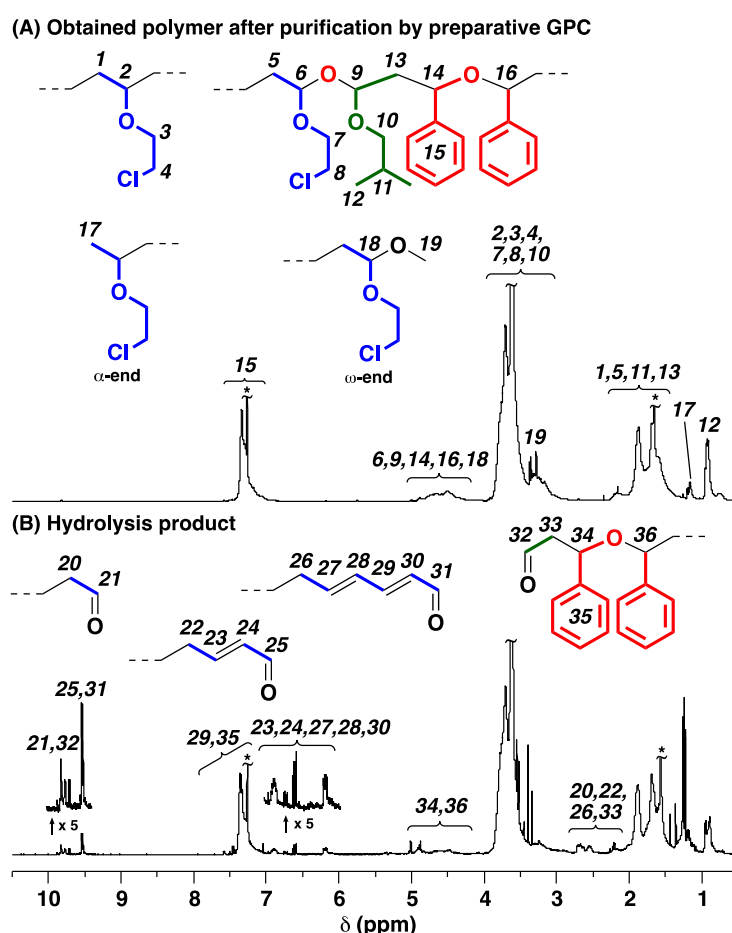

**Figure S16.**  $^1\text{H}$  NMR spectra of (A) the obtained polymer by the cationic copolymerization of CEVE and the cyclic trimer consisting of IBVE and BzA (entry 2 in Table 2) and (B) its acid hydrolysis product [in  $\text{CDCl}_3$  at  $30\text{ }^\circ\text{C}$ ;  $M_n(\text{GPC}) = 2.2 \times 10^3$ ,  $M_w/M_n(\text{GPC}) = 1.43$ ; after purification by preparative GPC; \*  $\text{CHCl}_3$  or water; only ABCC-type monomer sequences were drawn; acid hydrolysis condition:  $0.9\text{ M HCl}$  in 1,2-dimethoxyethane at room temperature for 2 h. Other procedures were conducted in similar to that in methanolysis].

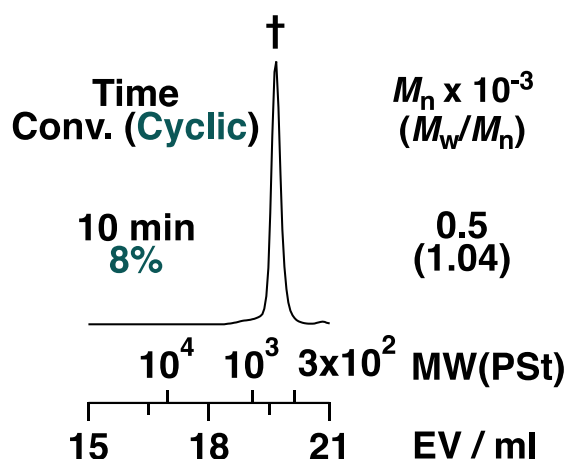

**Figure S17.** MWD curve of the product obtained in the cationic homopolymerization of the cyclic trimer consisting of IBVE and NNE ( $[\text{cyclic trimer (IBVE-NNE)}]_0 = 1.0 \text{ M}$ ,  $[\text{EtSO}_3\text{H}]_0 = 4.0 \text{ mM}$ ,  $[\text{GaCl}_3]_0 = 10 \text{ mM}$ , in toluene/*n*-hexane (6/4 v/v) at  $-78 \text{ }^\circ\text{C}$ ; † unreacted cyclic trimer).

**Note for Figure S17.** Peaks assigned to polymer products were not observed, which indicates that the homopolymerization of the cyclic trimer consisting of IBVE and NNE did not proceed.

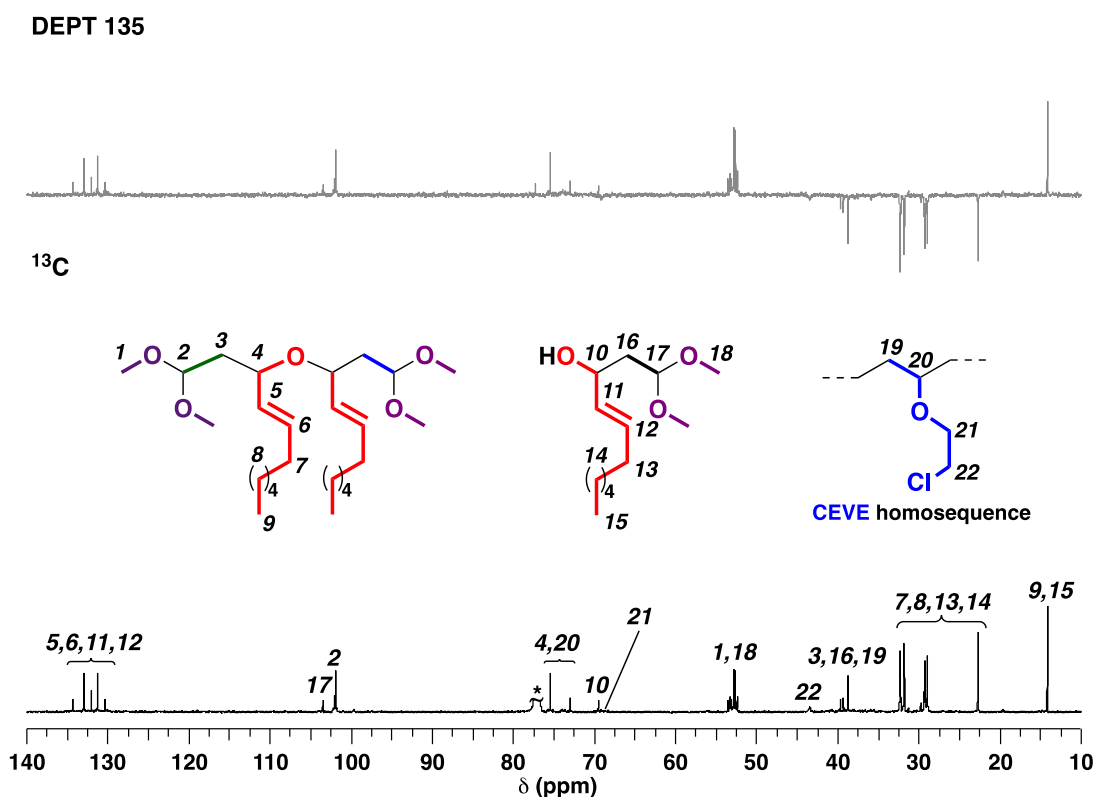

**Figure S18.**  $^{13}\text{C}$  and DEPT 135 NMR spectra of the acid methanolysis product of the polymer obtained by the copolymerization of CEVE and the cyclic trimer (IBVE-NNE) [entry 2 in Table 3; the same sample as that for  $^1\text{H}$  NMR analysis (Figure 5, lower); in  $\text{CDCl}_3$  at  $30 \text{ }^\circ\text{C}$ ; \*  $\text{CDCl}_3$ ].

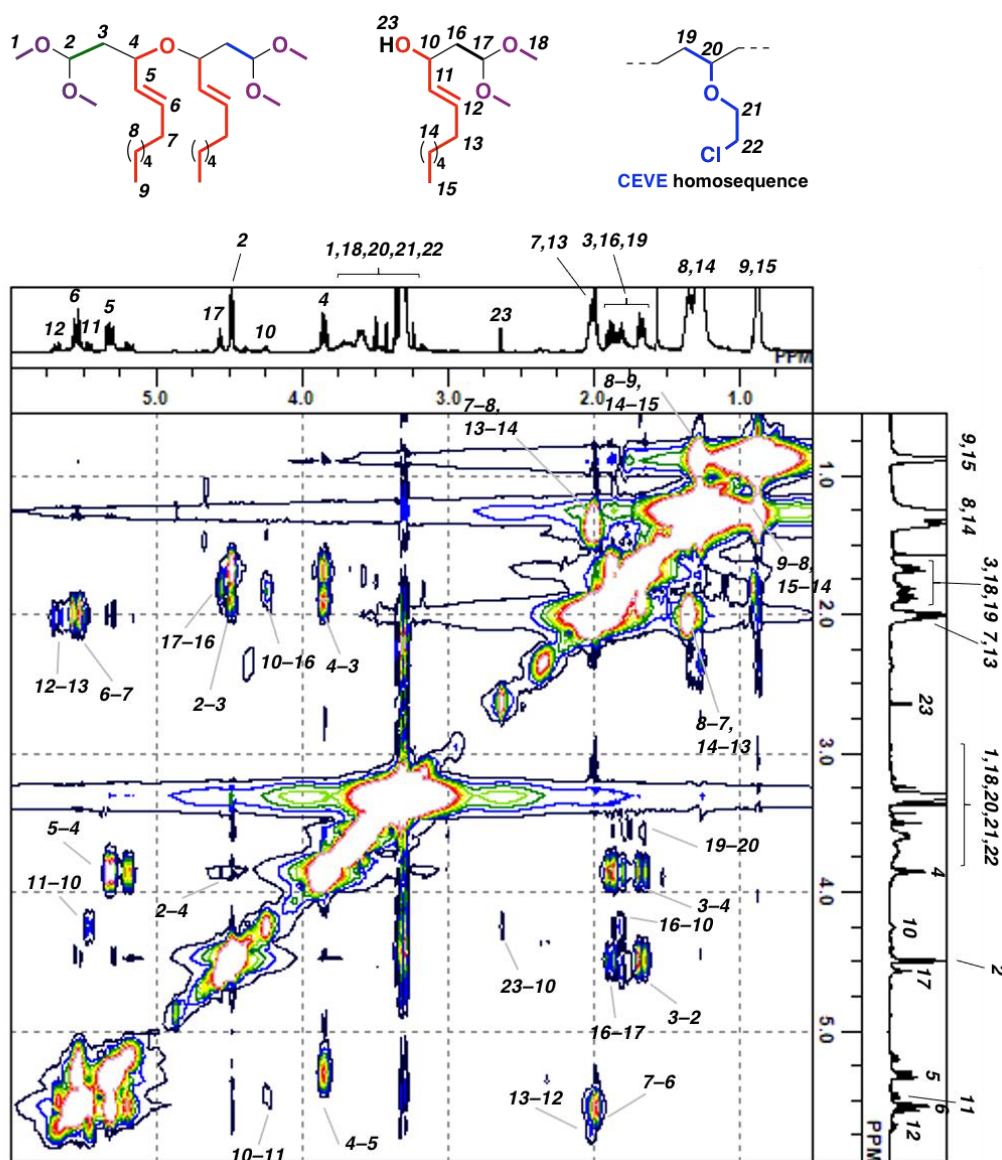

**Figure S19.**  $^1\text{H}$ - $^1\text{H}$  COSY spectrum of the acid methanolysis product of the obtained polymer by the copolymerization of CEVE and the cyclic trimer (IBVE-NNE) (entry 2 in Table 3; in  $\text{CDCl}_3$  at  $30^\circ\text{C}$ ).

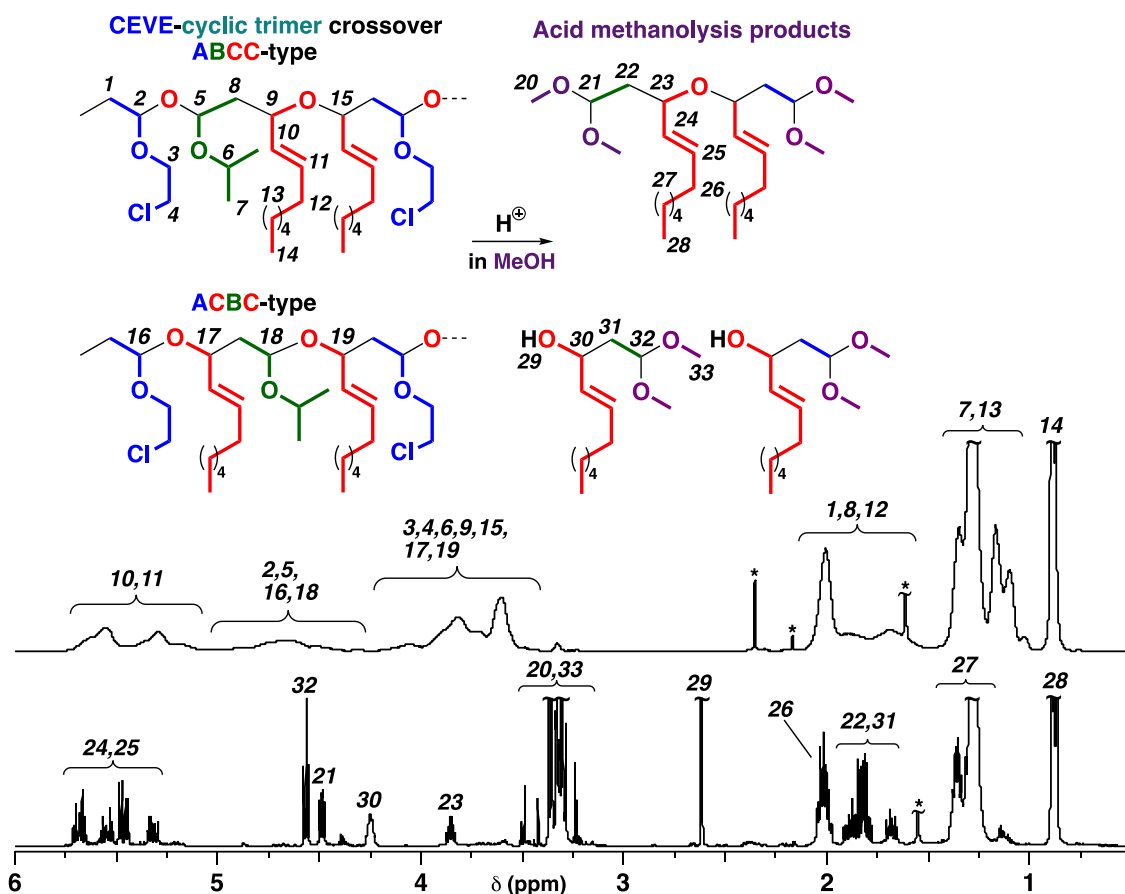

**Figure S20.**  $^1\text{H}$  NMR spectra of the polymer obtained by the cationic copolymerization of CEVE and the cyclic trimer consisting of IPVE and NNE and its acid methanolysis product (entry 7 in Table 3; after purification by preparative GPC; in  $\text{CDCl}_3$  at  $30^\circ\text{C}$ ; \* water or others).

**Note for Figure S20.** The peak intensities of the acid methanolysis product derived from ACBC-type monomer sequences (peaks 29, 30, and 32) were larger than those obtained by the copolymerization of CEVE and the cyclic trimer consisting of IBVE and NNE (Figure 5, lower).

**Table S1.** Cationic copolymerization of CEVE and cyclic trimer consisting of IBVE and NNE <sup>a</sup>

| entry | CEVE (M) | cyclic trimer | (M)  | temp. (°C) | solvent (v/v)  |            | conv. (%) <sup>b</sup> |               |                          | units per block <sup>d</sup> |                  |               | ABCC/ACBC ratio <sup>e</sup> |
|-------|----------|---------------|------|------------|----------------|------------|------------------------|---------------|--------------------------|------------------------------|------------------|---------------|------------------------------|
|       |          |               |      |            | toluene/hexane | time (min) | CEVE                   | cyclic trimer | $M_n \times 10^{-3}{}^c$ | $M_w/M_n{}^c$                | CEVE             | cyclic trimer |                              |
| 1     | 0.10     | IBVE-NNE      | 1.0  | -40        | 6/4            | 5          | >99                    | 19            | 1.3                      | 1.41                         | 1.0 <sub>0</sub> | 1.0           | 67/33                        |
| 2     | 0.10     | IBVE-NNE      | 1.0  | -60        | 6/4            | 5          | >99                    | 10            | 2.5                      | 1.52                         | 1.0 <sub>7</sub> | 1.0           | 79/21                        |
| 3     | 0.051    | IBVE-NNE      | 0.51 | -100       | 9/1            | 30         | >99                    | 15            | 3.6                      | 1.68                         | 1.0 <sub>0</sub> | 1.0           | 67/33                        |

<sup>a</sup> [EtSO<sub>3</sub>H]<sub>0</sub> = 4.0 (entries 1 and 2) or 2.0 (entry 3) mM, [GaCl<sub>3</sub>]<sub>0</sub> = 10 mM, at -78 °C. <sup>b</sup> Determined by the <sup>1</sup>H NMR analysis of quenched reaction mixtures. <sup>c</sup> Determined by GPC (polystyrene standards). <sup>d</sup> Estimated by the <sup>1</sup>H NMR analysis of the obtained products after purification by preparative GPC. <sup>e</sup> Determined by the <sup>1</sup>H NMR analysis of the acid methanolysis products.

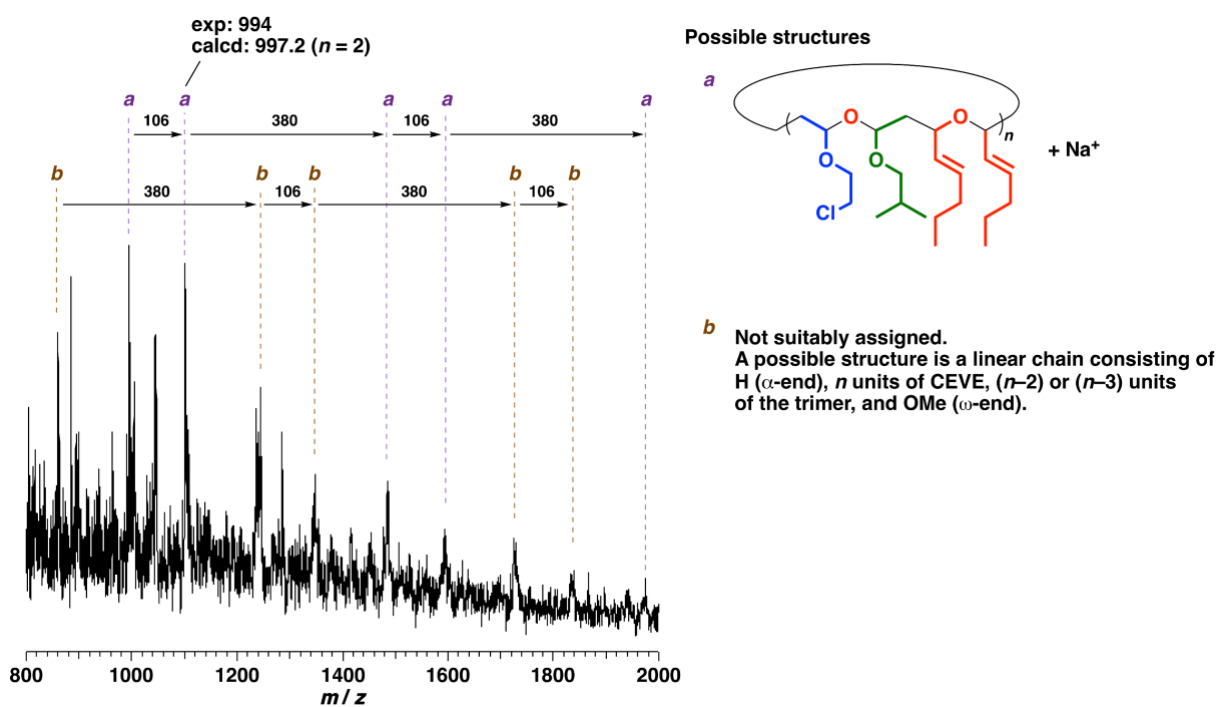

**Figure S21.** MALDI-TOF-MS spectrum of the polymer obtained by the alternating cationic copolymerization of CEVE and the cyclic trimer consisting of IBVE and NNE (entry 3 in Table 3). The ABAC-type sequences were ignored. Linear chains with a proton at the  $\alpha$ -end and an olefin structure resulting from  $\beta$ -proton elimination reaction at the  $\omega$ -end also have the same mass values as those of the cyclic structure (series *a*); however, such olefin structures were not observed in the <sup>1</sup>H NMR spectrum.
